# Supplementary material for: Probing molecular dynamics with hyperpolarized ultrafast Laplace NMR using a low-field, single-sided magnet
Source: PubMed Central journal article supplement (PMC6053973; doi:10.1039/c8sc01329b), 2018-06-28
Supplement: SC-009-C8SC01329B-s001.pdf [file SC-009-C8SC01329B-s001.pdf]

*Electronic Supporting Information for*

## **Probing molecular dynamics with hyperpolarized ultrafast Laplace NMR using a low-field, single-sided magnet**

Jared N. King, Alfredo Fallorina, Justin Yu, Guannan Zhang, Ville-Veikko Telkki, Christian Hilty, and Tyler Meldrum

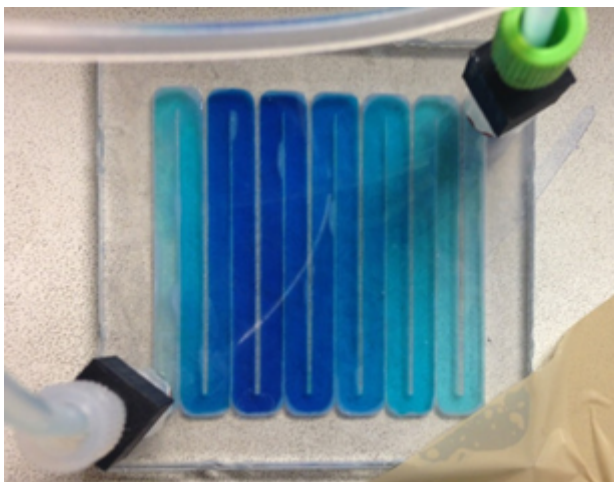

**Figure S1.** A sample holder made from Lexan used for DNP-hyperpolarized  $D-T_2$  measurements of water. The s-patterned channels are 1.5 mm deep and span a 5 cm  $\times$  5 cm area, matching the area of the rf coil (total volume  $\sim$ 3 mL). The holder was placed within the sensitive region by supporting it on 4 mm glass slides on the magnet. The blue dye in the channel was not part of the  $D-T_2$  experiment but was used to confirm an appropriate injection time for delivering the sample in the holder.

**Table S1: Ultrafast experimental parameters**

|                                                 | ethylene glycol | water doped with copper (II) sulfate | glycerol | water in molecular sieves | DNP Water |
|-------------------------------------------------|-----------------|--------------------------------------|----------|---------------------------|-----------|
| CHIRP pulse length [ $\mu\text{s}$ ]            | 477             | 127                                  | 2477     | 196.8                     | 193.8     |
| CHIRP pulse power [kHz]                         | 48.1            | 48.1                                 | 32.1     | 24.1                      | 16.7      |
| CHIRP pulse spatial bandwidth [ $\mu\text{m}$ ] | 300             | 300                                  | 300      | 300                       | 200       |
| dwel time per point [ $\mu\text{s}$ ]           | 4               | 4                                    | 4        | 2                         | 6         |
| acquired points per echo                        | 152             | 78                                   | 78       | 72                        | 54        |
| acquisition time per echo [ $\mu\text{s}$ ]     | 612             | 312                                  | 312      | 144                       | 324       |
| number of echoes                                | 512             | 128                                  | 128      | 128                       | 64        |
| echo time [ $\mu\text{s}$ ]                     | 700             | 400                                  | 700      | 250                       | 400       |
| repetition time [ms]                            | 1500            | 700                                  | 700      | 1000                      | 400       |
| number of scans                                 | 4096            | 1024                                 | 4096     | 8192                      | 1         |
| $\Delta$ [ms]                                   | 20              | 5                                    | 30       | 6                         | 5         |
| $\delta$ [ms]                                   | 1               | 0.3                                  | 5        | 0.4                       | 0.4       |

**Table S2: Traditional experimental parameters**

|                                       | ethylene glycol | water doped with copper (II) sulfate | glycerol   | water in molecular sieves |
|---------------------------------------|-----------------|--------------------------------------|------------|---------------------------|
| acquired points per echo              | 152             | 78                                   | 78         | 72                        |
| dwel time per point [ $\mu\text{s}$ ] | 4               | 4                                    | 4          | 2                         |
| number of scans                       | 512             | 256                                  | 1024       | 1024                      |
| number of 2D points                   | 21              | 25                                   | 21         | 25                        |
| echo time [ $\mu\text{s}$ ]           | 700             | 400                                  | 700        | 250                       |
| number of echoes                      | 512             | 128                                  | 128        | 128                       |
| repetition time [ms]                  | 1500            | 700                                  | 700        | 1000                      |
| $\Delta$ [ms]                         | 20              | 5                                    | 30         | 6                         |
| $\delta$ [ms]                         | 1               | 0.3                                  | 5          | 0.4                       |
| $\delta_{eff}$ [ $\mu\text{s}$ ]      | 0.1–988         | 0.1–287.8                            | 0.1–4987.8 | 0.1–388                   |

**Table S3:  $T_2$ ,  $D$ , and SNR comparison**

| Sample                               | $T_1$ /ms         | Meas. type | $T_2$ /ms <sup>a</sup>       | $D/10^{-9} \text{ m}^2 \text{ s}^{-1}$ <sup>a</sup> | SNR   | $N^b$ | SNR/ $(N^{1/2})$ | UF gain <sup>c</sup> |
|--------------------------------------|-------------------|------------|------------------------------|-----------------------------------------------------|-------|-------|------------------|----------------------|
| ethylene glycol                      | 285               | TRAD       | $55 \pm 16$                  | $0.2 \pm 0.1$                                       | 58.15 | 512   | 0.5608           | 1.130                |
|                                      |                   | UF         | $36 \pm 6$                   | $0.17 \pm 0.08$                                     | 40.54 | 4096  | 0.6334           |                      |
| water doped with copper (II) sulfate | 19                | TRAD       | $8 \pm 3$                    | $2 \pm 1$                                           | 70.20 | 256   | 0.8775           | 2.043                |
|                                      |                   | UF         | $6 \pm 2$                    | $1.8 \pm 0.4$                                       | 57.38 | 1024  | 1.794            |                      |
| glycerol                             | 31                | TRAD       | $12 \pm 8$                   | $0.0026 \pm 0.0005$                                 | 44.37 | 1024  | 0.3026           | 1.212                |
|                                      |                   | UF         | $8 \pm 1$                    | $0.005 \pm 0.002$                                   | 23.47 | 4096  | 0.3667           |                      |
| water in molecular sieves            | 2500 <sup>d</sup> | TRAD       | $20 \pm 10$<br>$1.8 \pm 0.3$ | $2.6 \pm 0.3$<br>$1.0 \pm 0.5$                      | 19.95 | 1024  | 0.1247           | 1.830                |
|                                      |                   | UF         | $12 \pm 4$<br>$1.1 \pm 0.3$  | $1.7 \pm 0.3$<br>$2.0 \pm 0.5$                      | 20.65 | 8192  | 0.2282           |                      |
| DNP-hyperpolarized water             | 2500 <sup>e</sup> | UF         | $7 \pm 2$                    | $2.2 \pm 0.8$                                       | 139.1 | 1     | 139.1            | —                    |

<sup>a</sup>The errors in  $T_2$  and  $D$  are maximum errors, determined from the width of the peaks on a logarithmic scale, which is the scale used for ILT.

<sup>b</sup>Number of acquired scans, not factoring in multiple indirect points for the traditional acquisitions

<sup>c</sup>Calculated using an SNR/ $(N^{1/2})$  basis

<sup>d</sup> $T_1$  of bulk water, not necessarily that of water trapped in the sieves

<sup>e</sup> $T_1$  of DI water, irrelevant for hyperpolarized samples
